# Supplementary material for: Abnormalities of Hippocampal Subfield and Amygdalar Nuclei Volumes and Clinical Correlates in Behavioral Variant Frontotemporal Dementia with Obsessive–Compulsive Behavior—A Pilot Study
Source: MDPI journal article supplement (doi:10.3390/brainsci13111582), 2023-11-11
Supplement: s1 [file s1]

Supplementary Figure S1: Y-BOCS and left CA2/3 body volume mediation model; a, b, c, and c' are path coefficients representing unstandardized regression weights and standard errors (in parentheses). The c path coefficient represents the total effect of the left CA2/3 body volume on Y-BOCS score. The c' path coefficient refers to the direct effect of the left CA2/3 body volume score on Y-BOCS score. All analyzed a, b, and c paths with solid line were significant. CA: cornu ammonis; Y-BOCS:the Yale–Brown Obsessive–Compulsive Scale; OFC: orbitofrontal cortex.

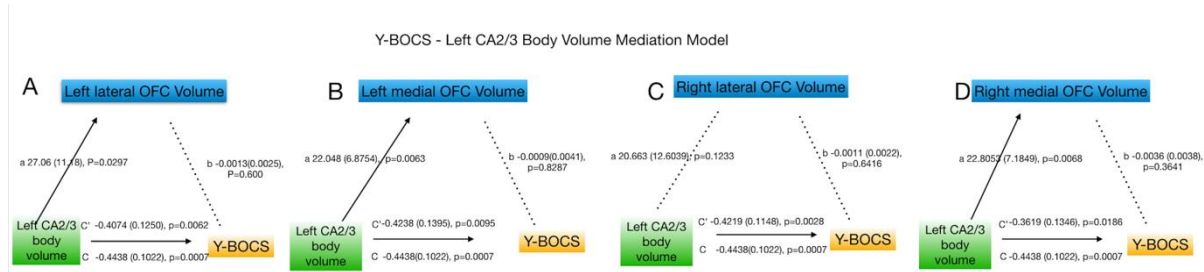

Supplementary Table S1. Normality tests (Kolmogorov-Smirnoff and Shapiro-Wilk test)

|                             |                         | Kolmogorov-Smirnoff | Shapiro-Wilk test |
|-----------------------------|-------------------------|---------------------|-------------------|
| Age, y                      |                         | 0.096               | 0137              |
| education                   |                         | 0.002               | 0.009             |
| MMSE                        |                         | <0.001              | <0.001            |
| TIV                         |                         | .127                | .169              |
| Hippocampal subfield volume |                         |                     |                   |
| Left                        | Parasubiculum           | .200                | .852              |
|                             | Presubiculum-head       | .200                | .546              |
|                             | Presubiculum-body       | .200                | .586              |
|                             | Subiculum-head          | .200                | .943              |
|                             | Subiculum-body          | .185                | .684              |
|                             | CA1-head                | .200                | .958              |
|                             | CA1-body                | .200                | .961              |
|                             | CA2/3-head              | .200                | .198              |
|                             | CA2/3-body              | .200                | .910              |
|                             | CA4-head                | .143                | .078              |
|                             | CA4-body                | .126                | .043              |
|                             | GC-ML-DG-head           | .200                | .461              |
|                             | GC-ML-DG-body           | .168                | .228              |
|                             | Molecular_layer_HP-head | .200                | .880              |
|                             | Molecular_layer_HP-body | .200                | .356              |
|                             | HATA                    | .200                | .531              |
|                             | Fimbria                 | .200                | .648              |
|                             | Hippocampal tail        | .200                | .785              |
|                             | Hippocampal fissure     | .110                | .631              |
|                             | Whole hippocampus       | .116                | .292              |
| Right                       | Parasubiculum           | .200                | .130              |
|                             | Presubiculum-head       | .136                | .599              |
|                             | Presubiculum-body       | .200                | .643              |
|                             | Subiculum-head          | .200                | .971              |
|                             | Subiculum-body          | .200                | .245              |
|                             | CA1-head                | .200                | .776              |
|                             | CA1-body                | .200                | .481              |

|                         |      |      |
|-------------------------|------|------|
| CA2/3-head              | .200 | .951 |
| CA2/3-body              | .200 | .631 |
| CA4-head                | .200 | .669 |
| CA4-body                | .200 | .584 |
| GC-ML-DG-head           | .200 | .567 |
| GC-ML-DG-body           | .200 | .348 |
| Molecular_layer_HP-head | .200 | .810 |
| Molecular_layer_HP-body | .200 | .296 |
| HATA                    | .200 | .933 |
| Fimbria                 | .200 | .183 |
| Hippocampal tail        | .200 | .291 |
| Hippocampal-fissure     | .200 | .623 |
| Whole hippocampus       | .200 | .714 |

Supplementary Table S2. Simple mediation

| Clinical severity | Hippocampal subfield volume    | OFC volume    | a                              | b                             | c                             | c'                            |
|-------------------|--------------------------------|---------------|--------------------------------|-------------------------------|-------------------------------|-------------------------------|
| Y-BOCS            | Left CA2/3 body volume         | Left lateral  | 27.06 (11.18),<br>P=0.0297     | -0.0013 (0.0025),<br>P=0.6    | -0.4438 (0.1022),<br>p=0.0007 | -0.4074 (0.1250),<br>p=0.0062 |
|                   |                                | Left medial   | 22.048 (6.8754),<br>p=0.0063   | -0.0009(0.0041),<br>p=0.8287  | -0.4438(0.1022),<br>p=0.0007  | -0.4238 (0.1395),<br>p=0.0095 |
|                   |                                | Right lateral | 20.663 (12.6039),<br>p=0.1233  | -0.0011 (0.0022),<br>p=0.6416 | -0.4438(0.1022),<br>p=0.0007  | -0.4219 (0.1148),<br>p=0.0028 |
|                   |                                | Right medial  | 22.8053 (7.1849),<br>p=0.0068  | -0.0036 (0.0038),<br>p=0.3641 | -0.4438 (0.1022),<br>p=0.0007 | -0.3619 (0.1346),<br>p=0.0186 |
| Total NPI score   | Left GC-ML-DG body             | Left lateral  | 25.9079 (10.2830),<br>p=0.0245 | -0.0017 (0.0021),<br>p=0.4363 | -0.4089 (0.0786),<br>p=0.0001 | -0.3658 (0.0960),<br>p=0.0022 |
|                   |                                | Left medial   | 19.9578 (6.5265),<br>p=0.0085  | -0.0027 (0.0033),<br>p=0.4297 | -0.4089 (0.0786),<br>p=0.0001 | -0.3559 (0.1027),<br>p=0.0042 |
|                   |                                | Right lateral | 21.5522(11.4413),<br>p=0.0805  | -0.0012(0.0019),<br>p=0.5304  | -0.4089 (0.0786),<br>p=0.0001 | -0.3828 (0.0899),<br>p=0.0009 |
|                   |                                | Right medial  | 19.7570 (7.0027),<br>p=0.0136  | -0.0041 (0.0029),<br>p=0.1839 | -0.4089 (0.0786),<br>p=0.0001 | -0.3285 (0.0952),<br>p=0.0043 |
|                   | Left total hippocampal volumes | Left lateral  | 1.2033 (0.3841),<br>p=0.0073   | -0.0009 (0.0024),<br>p=0.7211 | -0.0162(0.0033),<br>p=0.0002  | -0.0152 (0.0044),<br>p=0.0044 |
|                   |                                | Left medial   | 0.9554(0.2254),<br>p=0.0008    | -0.0006 (0.0040),<br>p=0.8918 | -0.0162 (0.0033),<br>p=0.0002 | -0.0157 (0.0051),<br>p=0.0002 |

|                                    |                                        |                               |                                |                               |                                  |
|------------------------------------|----------------------------------------|-------------------------------|--------------------------------|-------------------------------|----------------------------------|
|                                    |                                        |                               |                                | p=0.0002                      | p=0.0092                         |
|                                    |                                        | 0.9944 (0.4442),<br>p=0.0420  | -0.0007 (0.0020),,<br>p=0.7643 | -0.0162 (0.0033),<br>p=0.0002 | -0.0156<br>(0.0039)<br>,p=0.0017 |
|                                    | Right lateral                          |                               |                                |                               |                                  |
|                                    |                                        | 0.9310 (0.2524),<br>p=0.0024  | -0.0030 (0.0035),<br>p=0.4144  | -0.0162 (0.0033),<br>p=0.0002 | -0.0135<br>(0.0047)<br>,p=0.0125 |
|                                    | Right medial                           |                               |                                |                               |                                  |
| Right total<br>hippocampal volumes | Left lateral                           | 1.4755 (0.5328),<br>p=0.0151  | -0.0033 (0.0028),<br>p=0.2654  | -0.0164 (0.0057),<br>p=0.0120 | -0.0116<br>(0.0070)<br>,p=0.1219 |
|                                    | Left medial                            | 1.3331 (0.2760),,<br>p=0.0003 | -0.0056 (0.0053),<br>P=0.3309  | -0.0164 (0.0057),<br>P=0.0120 | -0.0090<br>(0.0093),<br>P=0.3504 |
|                                    | Right lateral                          | 1.3221 (0.5867),<br>P=0.0408  | -0.0020 (0.0026),<br>P=0.4544  | -0.0164 (0.0057),<br>P=0.0120 | -0.0138<br>(0.0068),<br>P=0.0626 |
|                                    | Right medial                           | 1.2402 (0.3317),<br>P=0.0022  | -0.0069 (0.0044),<br>P=0.1352  | -0.0164 (0.0057),<br>P=0.0120 | -0.0078<br>(0.0076),<br>P=0.3249 |
| FBI                                | Left molecular layer of<br>the HP body | 15.4311 (6.0821),<br>P=0.0237 | -0.0005 (0.0016),<br>P=0.7557  | -0.1602 (0.0342),<br>P=0.0003 | -0.1526<br>(0.0427),<br>P=0.0034 |
|                                    | Left lateral                           |                               |                                |                               |                                  |
|                                    | Left medial                            | 12.2654 (3.7707),<br>P=0.0058 | -0.0003 (0.0025),<br>P=0.8951  | -0.1602 (0.0342),<br>P=0.0003 | -0.1560<br>(0.0469),<br>P=0.0055 |
|                                    | Right lateral                          | 11.0461 (6.9956),<br>P=0.1367 | -0.0007 (0.0013),<br>P=0.6319  | -0.1602 (0.0342),<br>P=0.0003 | -0.1529<br>(0.0381),<br>P=0.0015 |

|                       |                  |                    |                   |                   |                       |
|-----------------------|------------------|--------------------|-------------------|-------------------|-----------------------|
| Left CA4 body         | Right<br>medial  | 12.0008 (4.0915),  | -0.0022 (0.0022), | -0.1602 (0.0342), | -0.1341               |
|                       |                  | P=0.0109           | P=0.3486          | P=0.0003          | (0.0435),<br>P=0.0087 |
|                       | Left<br>lateral  | 31.1120 (10.5977), | -0.0003 (0.0018), | -0.2777 (0.0676), | -0.2674               |
|                       |                  | P=0.0108           | P=0.8534          | P=0.0011          | (0.0890),<br>P=0.0102 |
|                       | Left<br>medial   | 22.6522 (6.8724),  | -0.0008 (0.0027), | -0.2777 (0.0676), | -0.22593              |
|                       |                  | P=0.0053           | P=0.7700          | P=0.0011          | (0.0932),<br>P=0.0155 |
|                       | Right<br>lateral | 26.4179 (11.9948), | -0.0001 (0.0016), | -0.2777 (0.0676), | -0.2761               |
|                       |                  | P=0.0449           | P=0.9692          | P=0.0011          | (0.0814),<br>P=0.0048 |
|                       | Right<br>medial  | 23.5128 (7.1642),  | -0.0023 (0.0025), | -0.2777 (0.0676), | -0.2240               |
|                       |                  | P=0.0055           | P=0.3847          | P=0.0011          | (0.0905),<br>P=0.0279 |
| Left hippocampal tail | Left<br>lateral  | 4.7654 (2.1852),   | -0.0013 (0.0017), | -0.0491 (0.0135), | -0.0427               |
|                       |                  | P=0.0468           | P=0.4411          | P=0.0027          | (0.0159),<br>P=0.0184 |
|                       | Left<br>medial   | 3.8922 (1.3694),   | -0.0019 (0.0027), | -0.0491 (0.0135), | -0.0417               |
|                       |                  | P=0.0130           | P=0.4948          | P=0.0027          | (0.0173),<br>P=0.0314 |
|                       | Right<br>lateral | 3.5679 (2.4332),   | -0.0011 (0.0015), | -0.0491 (0.0135), | -0.0435 (0.0148),     |
|                       |                  | P=0.1647           | P=0.4963          | P=0.0027          | P=0.0091              |
|                       | Right<br>medial  | 3.8619 (1.4616),   | -0.0033 (0.0024), | -0.0491 (0.0135), | -0.0364 (0.0161),     |
|                       |                  | P=0.0193           | P=0.1934          | P=0.0027          | P=0.0413              |

The a, b, c, and c' are path coefficients representing unstandardized regression weights and standard errors (in parentheses). The c path coefficient represents the total effect of the hippocampal subfield volume on clinical severity. The c' path coefficient refers to the direct effect of the hippocampal subfield volume on clinical severity. All analyzed a, b, and c paths with solid line were significant. Y-BOCS, the Yale–Brown Obsessive–Compulsive Scale; NPI, Neuropsychiatric Inventory; FBI, Frontal Behavioral Inventory; CA, cornu ammonis; GC-ML-DG, granule cell molecular layer of dentate gyrus; HP, hippocampal; OFC: orbitofrontal cortex.
